# Supplementary material for: Prognosis of Acute Intracranial Atherosclerosis-Related Occlusion after Endovascular Treatment
Source: PubMed Central journal article supplement — J Stroke. 2018 Sep 30;20(3):394–403. doi: 10.5853/jos.2018.01627 (PMC6186924; doi:10.5853/jos.2018.01627), 2018-09-30
Supplement: jos-2018-01627-suppl1.pdf [file jos-2018-01627-suppl1.pdf]

## Supplementary Document

### Analyses of patients with intracranial atherosclerotic stenosis but without atrial fibrillation

#### Classification process and final grouping

Among the 720 patients enrolled in the registry, 496 were included in the current analyses. We performed a blinded evaluation of the underlying etiology, using endovascular treatment angiography combined with evaluation of repeat angiography during admission following endovascular treatment (EVT) (608 of 720 patients). After patients with atrial fibrillation were excluded from the intracranial atherosclerotic stenosis (ICAS) group, the Embolic and ICAS-related groups comprised included 421 and 75 patients, respectively.

#### Description of supplementary tables

Supplementary Table 1 describes the baseline clinical and laboratory data according to etiological classification. Supplementary Table 2 shows the comparison of treatments and outcomes. Supplementary Table 3 shows the effects of underlying etiology on good outcomes using a logistic regression model. These results from patients with ICAS-related occlusion but without atrial fibrillation are similar to the results obtained from patients with ICAS occlusion with or without atrial fibrillation in the main manuscript.

**Supplementary Table 1.** Comparison of baseline characteristics and risk factors among groups

| Characteristic                                        | Embolic group (n=421) | ICAS group (n=75) | P      |
|-------------------------------------------------------|-----------------------|-------------------|--------|
| Age (yr)                                              | 68.2±12.4             | 63.16±13.14       | 0.002  |
| Male sex                                              | 208 (49.8)            | 50 (66.7)         | 0.006  |
| Premorbid mRS score                                   | 0 (0–0)               | 0 (0–0)           | 0.586  |
| Initial NIHSS score                                   | 17 (13–21)            | 15 (11–19)        | 0.027  |
| ASPECTS on noncontrast CT                             | 7 (4–9)               | 8 (5–9)           | 0.248  |
| Location of occlusive lesions on baseline angiography |                       |                   | <0.001 |
| ICA T                                                 | 170 (40.4)            | 13 (17.3)         |        |
| MCA M1                                                | 205 (48.7)            | 61 (81.3)         |        |
| MCA M2                                                | 46 (10.9)             | 1 (1.3)           |        |
| Hypertension                                          | 257 (61.0)            | 44 (58.7)         | 0.698  |
| Diabetes mellitus                                     | 96 (22.8)             | 22 (29.3)         | 0.221  |
| Coronary artery occlusive disease                     | 53 (12.6)             | 5 (6.7)           | 0.141  |
| Current smoking                                       | 84 (20.0)             | 26 (34.7)         | 0.005  |
| Atrial fibrillation                                   | 267 (63.4)            | 0 (0)             | <0.001 |
| Prior antiplatelet                                    | 131 (31.1)            | 8 (10.7)          | <0.001 |
| Prior anticoagulant                                   | 71 (16.9)             | 1 (1.3)           | <0.001 |
| Laboratory data                                       |                       |                   |        |
| Blood glucose on admission (mg/dL)                    | 137.6±52.0            | 143.4±54.1        | 0.376  |
| HbA1c (%)                                             | 6.15±1.12             | 6.21±1.14         | 0.702  |
| Total cholesterol (mg/dL)                             | 163.0±52.2            | 188.0±43.4        | <0.001 |
| Triglyceride (mg/dL)                                  | 101.3±55.0            | 138.7±149.1       | 0.035  |
| HDL-C (mg/dL)                                         | 47.2±21.6             | 44.2±10.7         | 0.252  |
| LDL-C (mg/dL)                                         | 96.6±34.4             | 119.9±40.4        | <0.001 |
| ESR (mm/hr)                                           | 14.1±14.5             | 13.7±13.5         | 0.845  |
| CRP (mg/dL)                                           | 0.68±1.70             | 1.30±4.41         | 0.229  |

Values are presented as mean±standard deviation, number (%), or median (interquartile range).

ICAS, intracranial atherosclerotic stenosis; mRS, modified Rankin Scale; NIHSS, National Institutes of Health Stroke Scale; ASPECTS, Alberta Stroke Program Early CT Scores; CT, computed tomography; ICA, internal carotid artery; MCA, middle cerebral artery; HbA1c, glycosylated hemoglobin; HDL-C, high density lipoprotein cholesterol; LDL-C, low density lipoprotein cholesterol; ESR, erythrocyte sedimentation rate; CRP, C-reactive protein.

**Supplementary Table 2.** Comparison of treatment and outcomes among groups

| Variable                                 | Embolic group | ICAS group    | P      |
|------------------------------------------|---------------|---------------|--------|
| Onset-to-puncture time (min)             | 235 (165–374) | 320 (245–560) | <0.001 |
| Procedure time (min)                     | 55 (40–83)    | 68 (49–97)    | 0.002  |
| Intravenous tPA                          | 235 (55.8)    | 34 (45.3)     | 0.093  |
| Balloon guide catheter usage             | 311 (73.9)    | 49 (65.3)     | 0.127  |
| Stent retriever usage                    | 248 (58.9)    | 61 (81.3)     | <0.001 |
| Direct aspiration usage                  | 281 (66.7)    | 43 (57.3)     | 0.115  |
| Intracranial stenting                    | 9 (2.1)       | 9 (12.0)      | <0.001 |
| Intracranial ballooning without stenting | 2 (0.5)       | 7 (9.3)       | <0.001 |
| Number of techniques                     | 1 (1–2)       | 2 (2–3)       | <0.001 |
| Final reperfusion grade (mTICI)          |               |               | 0.027  |
| Grade 0                                  | 7 (1.7)       | 6 (8.0)       |        |
| Grade 1                                  | 8 (1.9)       | 2 (2.7)       |        |
| Grade 2a                                 | 71 (16.9)     | 10 (13.3)     |        |
| Grade 2b                                 | 209 (49.6)    | 33 (44.0)     |        |
| Grade 3                                  | 126 (29.9)    | 24 (32.0)     |        |
| Successful reperfusion (mTICI 2b–3)      | 335 (79.6)    | 57 (76.0)     | 0.484  |
| Final recanalization grade (AOL)         |               |               | <0.001 |
| Grade 0                                  | 6 (1.4)       | 6 (8.0)       |        |
| Grade 1                                  | 9 (2.1)       | 16 (21.3)     |        |
| Grade 2                                  | 31 (7.4)      | 45 (60.0)     |        |
| Grade 3                                  | 375 (89.1)    | 8 (10.7)      |        |
| Intracerebral hemorrhage                 |               |               | 0.504  |
| No hemorrhage                            | 272 (64.6)    | 56 (74.7)     |        |
| HT type 1                                | 33 (7.8)      | 4 (5.3)       |        |
| HT type 2                                | 48 (11.4)     | 7 (9.3)       |        |
| PH type 1                                | 34 (8.1)      | 3 (4.0)       |        |
| PH type 2                                | 34 (8.1)      | 5 (6.7)       |        |
| Serious hemorrhagic complications        | 45 (10.7)     | 6 (8.0)       | 0.480  |
| Reocclusion on repeat angiographies      | 9 (2.5)       | 12 (17.9)     | <0.001 |
| 3-Month mRS score                        | 2 (1–4)       | 3 (1–4)       | 0.729  |
| Good outcomes at 3 months                | 229 (54.5)    | 34 (45.3)     | 0.142  |

Values are presented as median (interquartile range) or number (%).

ICAS, intracranial atherosclerotic stenosis; tPA, tissue plasminogen activator; mTICI, modified treatment in cerebral ischemia; AOL, arterial occlusive lesion; HT, hemorrhagic transformation; PH, parenchymal hematoma; mRS, modified Rankin Scale.

**Supplementary Table 3.** Results of logistic regression model for evaluating the association between occlusion etiologies and good outcomes

| Variable                                         | Odds ratio (95% CI) | P      |
|--------------------------------------------------|---------------------|--------|
| Age (yr)                                         | 0.945 (0.925–0.966) | <0.001 |
| Male sex                                         | 0.957 (0.585–1.565) | 0.861  |
| Premorbid mRS score                              | 0.537 (0.377–0.767) | 0.001  |
| Initial NIHSS score                              | 0.897 (0.853–0.944) | <0.001 |
| Baseline intracranial occlusion                  |                     | 0.561  |
| ICA T                                            | Reference           |        |
| MCA M1                                           | 1.224 (0.723–2.072) | 0.452  |
| MCA M2                                           | 1.544 (0.656–3.636) | 0.320  |
| ASPECTS                                          | 1.318 (1.202–1.445) | <0.001 |
| Intravenous tPA use                              | 1.095 (0.634–1.889) | 0.745  |
| Onset-to-puncture time (min)                     | 0.999 (0.998–1.000) | 0.062  |
| Procedure time (min)                             | 0.980 (0.973–0.987) | <0.001 |
| Successful reperfusion                           | 2.451 (1.344–4.470) | 0.003  |
| PH2 or SAH 3–4                                   | 0.214 (0.080–0.573) | 0.002  |
| Underlying etiology (ICAS vs. embolic occlusion) | 0.432 (0.218–0.858) | 0.016  |

CI, confidence interval; mRS, modified Rankin Scale; NIHSS, National Institutes of Health Stroke Scale; ICA, internal carotid artery; MCA, middle cerebral artery; ASPECTS, Alberta Stroke Program Early CT Scores; tPA, tissue plasminogen activator; PH, parenchymal hematoma; SAH, subarachnoid hemorrhage; ICAS, intracranial atherosclerotic stenosis.
